# Supplementary material for: Follicular thyroid lesions: is there a discriminatory potential in the computerized nuclear analysis?
Source: PubMed Central journal article supplement — Endocr Connect. 2018 Jul 3;7(8):907–13. doi: 10.1530/EC-18-0237 (PMC6063880; doi:10.1530/ec-18-0237), 2018-07-03
Supplement: ec-7-907-t002.pdf [file ec-7-907-t002.pdf]

**SUPPLEMENTARY MATERIAL**

**Table 2.** Morphometric and textural parameters (variation coefficients), according to the histological material evaluated.

| <i>Parameter</i>    | <i>Histopathologic material*</i> |                      |                      |                      | <i>P**</i> |
|---------------------|----------------------------------|----------------------|----------------------|----------------------|------------|
|                     | <i>NT</i>                        | <i>FA</i>            | <i>FVPC</i>          | <i>FC</i>            |            |
| CV-Area             | 27.42 (20.7; 32.38)              | 25.06 (21.74; 28.85) | 30.65 (24.26; 33.99) | 28.5 (22.14; 31.97)  | 0.08       |
| CV-Mean Intensity   | 24.09 (21.18; 26.18)             | 24.47 (22.53; 26.91) | 22.3 (20.31; 25.44)  | 25.47 (23.38; 28.2)  | 0.02       |
| CV-STDEV            | 23.07 (20.58; 25.5)              | 21.46 (19.47; 24.63) | 22.41 (18.94; 25)    | 24.55 (18.57; 30.75) | 0.24       |
| CV-Perimeter        | 16.85 (13.53; 19.23)             | 16.06 (12.2; 20.14)  | 18.93 (14.95; 21.72) | 21.57 (15.63; 24.62) | 0.01       |
| CV-Circularity      | 12.84 (8.57; 18.03)              | 13.12 (9.74; 15.9)   | 15.89 (11.46; 21.53) | 20.3 (16.33; 25.06)  | 0.00       |
| CV-Feret            | 17.53 (14.53; 20.33)             | 15.38 (12.69; 19.15) | 17.28 (14.75; 20.19) | 19.12 (15.48; 20.99) | 0.22       |
| CV-Median Intensity | 33.22 (29.48; 35.84)             | 32.94 (29.13; 36.66) | 27.41 (24.34; 32.62) | 32.95 (29.1; 36.64)  | 0.00       |
| CV-AR               | 23.59 (20.2; 27.56)              | 18.72 (15.75; 24.14) | 22.53 (17.33; 29.03) | 20.44 (16.5; 23.21)  | 0.05       |
| CV-Round            | 18.96 (15.68; 22.91)             | 15.65 (13.52; 21.28) | 17.93 (14.51; 21.65) | 16.68 (13.83; 19.04) | 0.04       |
| CV-Solidity         | 3.96 (2.09; 5.76)                | 4.42 (2.78; 5.99)    | 5.23 (3.57; 7.61)    | 6.87 (5.38; 8.6)     | 0.00       |
| CV-Fractal          | 1.53 (1.31; 1.71)                | 1.7 (1.43; 2.15)     | 1.87 (1.38; 2.51)    | 1.54 (1.4; 1.88)     | 0.01       |
| CV-Entropy          | 0.35 (0.32; 0.39)                | 0.31 (0.22; 0.42)    | 0.47 (0.38; 0.58)    | 0.56 (0.33; 0.68)    | 0.00       |
| CV- Perimeter/Area  | 0.58 (0.53; 0.68)                | 0.61 (0.53; 0.75)    | 0.61 (0.55; 0.75)    | 0.82 (0.65; 0.89)    | 0.00       |
| CV-RA               | 15.5 (13.55; 16.93)              | 14.25 (11.51; 18.14) | 21.81 (18.39; 24.88) | 21.37 (16.34; 24.5)  | 0.00       |

\*Median (percentile 25; percentile 75). \*\*Significant differences (between the four groups):  $p < 0.05$ ; statistical test: Kruskal-Wallis. FA: follicular adenoma; AR: *Aspect Ratio*; FC: follicular carcinoma; CV: coefficient of variation; NT: normal thyroid; RA: roughness; *STDEV*: standard deviation of Gray intensity; FVPC: follicular variant of papillary carcinoma.  $\mu\text{m}$ : micrometer.
