# Supplementary material for: Follicular thyroid lesions: is there a discriminatory potential in the computerized nuclear analysis?
Source: PubMed Central journal article supplement — Endocr Connect. 2018 Jul 3;7(8):907–13. doi: 10.1530/EC-18-0237 (PMC6063880; doi:10.1530/ec-18-0237), 2018-07-03
Supplement: ec-7-907-t004.pdf [file ec-7-907-t004.pdf]

## SUPPLEMENTARY MATERIAL

**Table 4.** Comparative analysis between classifications obtained from the Classification and Regression Trees (CRT) method, with Twoing algorithm, and the histological classification of follicular adenomas (FA) and follicular carcinomas (FC).

| <i>Histological Classification</i> | <i>Classification by CRT</i> |           |                                   |
|------------------------------------|------------------------------|-----------|-----------------------------------|
|                                    | <i>FA</i>                    | <i>FC</i> | <i>Correct Classification (%)</i> |
| FA                                 | 42                           | 0         | 100                               |
| FC                                 | 0                            | 20        | 100                               |
| <i>Global Classification (%)</i>   |                              |           | 100                               |

FA: follicular adenomas; FC: follicular carcinomas.
